# Supplementary material
Source: publisher figshare collection journal article supplement (https://tandf.figshare.com/articles/dataset/_/7054295)
Supplement: Supplementary file 1 [file 1]

| Species                      | Strain    | Cell diameter [ $\mu$ ] | „Giant“ cells<br>diameter [ $\mu$ ] | Cell wall projections<br>present | Prominent vacuoles<br>in vegetative cells |
|------------------------------|-----------|-------------------------|-------------------------------------|----------------------------------|-------------------------------------------|
| <i>Eustigmatos vischeri</i>  | SAG 860-1 | (6) 7 – 9 (11)          | up to 35                            | -                                | -                                         |
| <i>E. magnus</i>             | SAG 36.89 | (7) 9 – 12 (18)         | -                                   | -                                | +                                         |
| <i>E. magnus</i>             | SAG 2266  | (7) 8 -10 (21)          | -                                   | -                                | +                                         |
| <i>E. magnus</i>             | SAG 2506  | 10 – 15 (25)            | -                                   | -                                | +                                         |
| <i>E. magnus</i>             | SAG 2370  | (8) 10 – 12 ()          | up to 31                            | -                                | +                                         |
| <i>E. polyphem</i>           | SAG 38.84 | (8) 9 – 12 (20)         | up to 100                           | -                                | +                                         |
| <i>Vischeria stellata</i>    | SAG 887-2 | 7 – 10 (12)             | -                                   | +                                | -                                         |
| <i>V. stellata</i>           | SAG 33.83 | (6.5) 8 - 12 (18)       | -                                   | +                                | -                                         |
| <i>V. punctata</i>           | SAG 887-1 | 6 – 8 (15)              | -                                   | +                                | -                                         |
| <i>V. helvetica</i>          | SAG 876-1 | (6) 8 – 11 (20)         | -                                   | +                                | -                                         |
| <i>Chloridella neglecta</i>  | SAG 48.84 | (6) 7 – 10 (13)         | -                                   | -                                | +                                         |
| <i>C. simplex</i>            | SAG 51.91 | (7) 8 – 9 (12)          | -                                   | -                                | -                                         |
| unidentified eustigmatophyte | SAG 2217  | 6 – 8 (10)              | -                                   | -                                | -                                         |
| unidentified eustigmatophyte | SAG 2220  | (6) 7 - 9 (10)          | -                                   | -                                | -                                         |
| unidentified eustigmatophyte | SAG 2215  | 8 – 10 (24)             | -                                   | -                                | +                                         |
