# Supplementary material
Source: publisher figshare collection journal article supplement (https://tandf.figshare.com/articles/dataset/_/7054295)
Supplement: Supplementary file 2 [file 1]

1

KY271662, *Eustigmatos magnus* SAG 36.89  
 AB731568, *Vischeria helvetica* KGUY 001  
 KF848920, *V. helvetica* CCALA 514  
 KF848922, *E. polyphem* CAUP Q102  
 KF848923, *Chloridella simplex* CCALA 279  
 KY271665, *E. magnus* SAG 2506  
 KY271669, *E. magnus* SAG 2266

2

JX188078, *E. calaminaris* CCALA 1014  
 JX188079, *E. calaminaris* CCALA 1013

3

FJ858971, *V. punctata* UTEX 86  
 FJ858972, *V. punctata* UTEX 153  
 KF848924, *C. neglecta* SAG 48.84  
 KP347779, *V. sp.* CAUP Q202  
 KP404701, uncultured clone WS071.070  
 KP404737, uncultured clone WS072.033  
 KY271664, *V. punctata* SAG 887-1  
 U41051, *E. magnus* EMU41051

|            | 239 | 258 | 258 | 262 | 405 | 460 | 623 | 667 | 671 | 1428 | 1721 | 1722 |
|------------|-----|-----|-----|-----|-----|-----|-----|-----|-----|------|------|------|
| 1 KY271662 | c   | g   | -   | a   | g   | c   | a   | c   | g   | g    | a    | g    |
| 1 AB731568 | .   | .   | .   | .   | .   | .   | .   | .   | .   | .    | .    | .    |
| 1 KF848920 | .   | .   | .   | .   | .   | .   | .   | .   | .   | .    | .    | .    |
| 1 KF848922 | .   | .   | .   | .   | .   | .   | .   | .   | .   | .    | .    | .    |
| 1 KF848923 | .   | .   | .   | .   | .   | .   | .   | .   | .   | .    | .    | .    |
| 1 KY271665 | .   | .   | .   | .   | .   | .   | .   | .   | .   | .    | .    | .    |
| 1 KY271669 | .   | .   | .   | .   | .   | .   | .   | .   | .   | .    | .    | .    |
| 2 JX188078 | .   | a   | .   | .   | .   | .   | .   | .   | .   | .    | .    | .    |
| 2 JX188079 | .   | a   | .   | .   | .   | .   | .   | .   | .   | .    | .    | .    |
| 3 FJ858971 | .   | .   | .   | .   | a   | .   | .   | .   | .   | .    | .    | .    |
| 3 FJ858972 | .   | .   | .   | .   | a   | .   | .   | .   | .   | .    | .    | .    |
| 3 KF848924 | .   | .   | .   | .   | a   | .   | .   | .   | .   | .    | .    | .    |
| 3 KP347779 | .   | .   | .   | .   | a   | .   | .   | .   | .   | .    | .    | .    |
| 3 KP404701 | .   | .   | .   | .   | a   | .   | .   | .   | .   | .    | .    | .    |
| 3 KP404737 | .   | .   | .   | .   | a   | .   | .   | .   | .   | .    | .    | .    |
| 3 KY271664 | .   | .   | .   | .   | a   | .   | .   | .   | .   | .    | .    | .    |
| 3 U41051   | .   | .   | .   | .   | a   | .   | .   | .   | .   | .    | .    | .    |
| 4 JX865375 | .   | .   | .   | .   | a   | .   | .   | .   | .   | g    | a    | .    |
| 4 KF848921 | .   | .   | .   | .   | a   | .   | .   | .   | .   | g    | a    | .    |
| 4 KJ713283 | .   | .   | .   | .   | a   | .   | .   | .   | .   | g    | a    | .    |
| 5 AF045051 | t   | .   | a   | .   | .   | .   | .   | .   | .   | .    | .    | .    |
| 5 JX188080 | t   | .   | a   | .   | .   | .   | .   | .   | .   | .    | .    | .    |
| 6 KY271663 | t   | .   | .   | .   | .   | .   | .   | .   | .   | .    | .    | .    |
| 7 FJ858973 | .   | .   | .   | t   | .   | .   | .   | .   | .   | .    | .    | .    |
| 7 KT191017 | .   | .   | .   | t   | .   | .   | .   | .   | .   | .    | .    | .    |
| 7 JX274590 | .   | .   | .   | t   | .   | g   | .   | .   | .   | .    | .    | .    |
| 7 JX188077 | .   | .   | .   | t   | .   | t   | .   | .   | .   | .    | .    | .    |
| 8 HQ710570 | .   | .   | .   | .   | .   | .   | t   | a   | .   | .    | .    | .    |
| 8 KF848919 | .   | .   | .   | .   | .   | .   | t   | a   | .   | .    | .    | .    |
| 8 KY271666 | .   | .   | .   | .   | .   | .   | t   | a   | .   | .    | .    | .    |

4

JX865375, *E. cf. polyphem* CAUP H4302  
 KF848921, *E. cf. polyphem* CAUP H4302  
 KJ713283, *E. vischeri* CCAP 860/7

5

AF045051, *V. helvetica* UTEX 49  
 JX188080, *V. helvetica* SAG 876-1

6

KY271663, *E. magnus* SAG 2370

7

FJ858973, *E. vischeri* UTEX 310  
 KT191017, *E. vischeri* JNU 4  
 JX274590, *E. vischeri* SAG 860-1  
 JX188077, *E. polyphem* SAG 38.84

8

HQ710570, *V. stellata* SAG 33.83  
 KF848919, *V. stellata* SAG 33.83  
 KY271666, *V. stellata* SAG 887-2
