# Supplementary material
Source: publisher figshare collection journal article supplement (https://tandf.figshare.com/articles/dataset/_/7054295)
Supplement: Supplementary file 5 [file 1]

| Strain (accession number)                                                                         | 1  | 2  | 3  | 4  | 5  | 6  | 7  | 8  | 9  | 10 | 11 | 12 | 13 | 14 | 15 | 16 | 17 | 18 | 19 | 20 | 21 | 22 | 23 | 24 | 25 |
|---------------------------------------------------------------------------------------------------|----|----|----|----|----|----|----|----|----|----|----|----|----|----|----|----|----|----|----|----|----|----|----|----|----|
| 1 <i>Vischeria stellata</i> SAG 33.83 (KY271674)                                                  | -  |    |    |    |    |    |    |    |    |    |    |    |    |    |    |    |    |    |    |    |    |    |    |    |    |
| 2 <i>V. stellata</i> SAG 887-2 (KY271675)                                                         | 1  | -  |    |    |    |    |    |    |    |    |    |    |    |    |    |    |    |    |    |    |    |    |    |    |    |
| 3 <i>V. helvetica</i> SAG 876-1 (KY271672) <sup>1</sup> / <i>V. punctata</i> SAG 887-1 (KY271673) | 16 | 17 | -  |    |    |    |    |    |    |    |    |    |    |    |    |    |    |    |    |    |    |    |    |    |    |
| 4 <i>Eustigmatos magnus</i> SAG 2370 (KY271677)                                                   | 17 | 18 | 4  | -  |    |    |    |    |    |    |    |    |    |    |    |    |    |    |    |    |    |    |    |    |    |
| 5 <i>E. magnus</i> SAG 2266 (KY271676)                                                            | 19 | 20 | 6  | 4  | -  |    |    |    |    |    |    |    |    |    |    |    |    |    |    |    |    |    |    |    |    |
| 6 <i>E. calaminaris</i> CCALA 1014 (JX202554) <sup>2</sup>                                        | 14 | 15 | 6  | 6  | 8  | -  |    |    |    |    |    |    |    |    |    |    |    |    |    |    |    |    |    |    |    |
| 7 <i>E. polyphem</i> SAG 38.84 clone 6 (KY271691) <sup>3</sup>                                    | 19 | 20 | 6  | 4  | 6  | 8  | -  |    |    |    |    |    |    |    |    |    |    |    |    |    |    |    |    |    |    |
| 8 <i>E. polyphem</i> SAG 38.84 clone 7 (KY271692)                                                 | 18 | 19 | 5  | 3  | 5  | 7  | 3  | -  |    |    |    |    |    |    |    |    |    |    |    |    |    |    |    |    |    |
| 9 <i>E. polyphem</i> SAG 38.84 clone 3 (KY271689)                                                 | 17 | 18 | 4  | 2  | 4  | 6  | 2  | 1  | -  |    |    |    |    |    |    |    |    |    |    |    |    |    |    |    |    |
| 10 <i>E. polyphem</i> SAG 38.84 clone 4 (KY271690)                                                | 15 | 16 | 7  | 7  | 9  | 1  | 9  | 8  | 7  | -  |    |    |    |    |    |    |    |    |    |    |    |    |    |    |    |
| 11 <i>E. vischeri</i> SAG 860-1 clone 5 (KY271695) <sup>4</sup>                                   | 19 | 20 | 8  | 8  | 10 | 8  | 10 | 9  | 8  | 9  | -  |    |    |    |    |    |    |    |    |    |    |    |    |    |    |
| 12 <i>E. vischeri</i> SAG 860-1 clone 9 (KY271696)                                                | 20 | 21 | 9  | 9  | 11 | 9  | 11 | 10 | 9  | 10 | 1  | -  |    |    |    |    |    |    |    |    |    |    |    |    |    |
| 13 <i>E. vischeri</i> SAG 860-1 clone 1 (KY271693)                                                | 20 | 21 | 9  | 9  | 11 | 9  | 11 | 10 | 9  | 10 | 1  | 2  | -  |    |    |    |    |    |    |    |    |    |    |    |    |
| 14 <i>E. vischeri</i> SAG 860-1 clone 2 (KY271694)                                                | 21 | 22 | 10 | 10 | 12 | 10 | 12 | 11 | 10 | 11 | 2  | 3  | 3  | -  |    |    |    |    |    |    |    |    |    |    |    |
| 15 Environmental clone BM3S41 (KY940041)                                                          | 14 | 15 | 9  | 10 | 12 | 6  | 12 | 11 | 10 | 7  | 10 | 11 | 10 | 12 | -  |    |    |    |    |    |    |    |    |    |    |
| 16 <i>E. magnus</i> SAG 36.89 clone 9 (KY271688) <sup>5</sup>                                     | 19 | 20 | 11 | 9  | 11 | 10 | 11 | 10 | 9  | 11 | 13 | 14 | 14 | 15 | 13 | -  |    |    |    |    |    |    |    |    |    |
| 17 <i>E. magnus</i> SAG 36.89 clone 6 (KY271686)                                                  | 20 | 21 | 12 | 10 | 12 | 11 | 12 | 11 | 10 | 12 | 14 | 15 | 15 | 16 | 14 | 1  | -  |    |    |    |    |    |    |    |    |
| 18 <i>E. magnus</i> SAG 36.89 clone 8 (KY271687)                                                  | 20 | 21 | 12 | 10 | 12 | 11 | 12 | 11 | 10 | 12 | 14 | 15 | 15 | 16 | 14 | 1  | 2  | -  |    |    |    |    |    |    |    |
| 19 <i>E. magnus</i> SAG 36.89 clone 2 (KY271685)                                                  | 21 | 22 | 13 | 11 | 13 | 12 | 13 | 12 | 11 | 13 | 15 | 16 | 14 | 17 | 14 | 2  | 3  | 3  | -  |    |    |    |    |    |    |
| 20 Unidentified eustigmatophyte UTEX 2631 (FJ937351)                                              | 14 | 15 | 8  | 9  | 11 | 6  | 10 | 10 | 9  | 7  | 11 | 12 | 12 | 13 | 6  | 12 | 13 | 13 | 14 | -  |    |    |    |    |    |
| 21 <i>Chloridella simplex</i> SAG 51.91 (KY271671)                                                | 19 | 20 | 6  | 6  | 8  | 8  | 8  | 7  | 6  | 9  | 10 | 11 | 11 | 12 | 12 | 13 | 14 | 14 | 15 | 11 | -  |    |    |    |    |
| 22 <i>E. vischeri</i> CCAP 860/7 (KJ713283)                                                       | 19 | 20 | 14 | 15 | 17 | 11 | 17 | 16 | 15 | 12 | 17 | 18 | 17 | 19 | 8  | 18 | 19 | 19 | 19 | 11 | 17 | -  |    |    |    |
| 23 <i>C. neglecta</i> SAG 48.84 (KY271697)                                                        | 19 | 20 | 14 | 15 | 17 | 11 | 17 | 16 | 15 | 12 | 17 | 18 | 18 | 19 | 11 | 18 | 19 | 19 | 20 | 11 | 17 | 16 | -  |    |    |
| 24 Unidentified eustigmatophyte SAG 2561 (KY271679)                                               | 22 | 23 | 16 | 16 | 18 | 13 | 18 | 15 | 16 | 14 | 19 | 20 | 20 | 19 | 15 | 16 | 17 | 17 | 18 | 14 | 18 | 20 | 18 | -  |    |
| 25 Unidentified eustigmatophyte SAG 2553 (KY271680)                                               | 20 | 21 | 23 | 23 | 25 | 21 | 25 | 24 | 23 | 22 | 24 | 25 | 25 | 26 | 22 | 24 | 25 | 25 | 26 | 21 | 25 | 25 | 27 | 28 | -  |
| 26 <i>E. magnus</i> SAG 2506 (KY271678)                                                           | 32 | 33 | 28 | 28 | 29 | 25 | 30 | 29 | 28 | 26 | 30 | 31 | 31 | 32 | 26 | 32 | 33 | 33 | 34 | 28 | 30 | 33 | 32 | 30 | 38 |

<sup>1</sup>sequence identical with JX202559 of the same strain

<sup>2</sup>sequence identical with JX202555 (*E. calaminaris* CCALA 1013)

<sup>3</sup>sequence identical with JX202558 of the same strain

<sup>4</sup>sequence identical with JX202556 of the same strain

<sup>5</sup>sequence identical with JX202557 of the same strain
