# Supplementary material
Source: publisher figshare collection journal article supplement (https://tandf.figshare.com/articles/dataset/_/7054295)
Supplement: Supplementary file 7 [file 1]

### ***Vischeria*-clade**

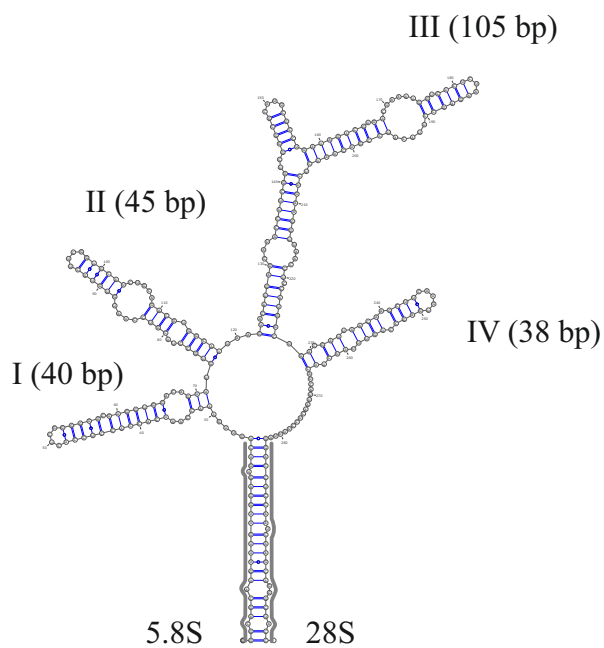

**A.** *Vischeria punctata* SAG 887-1

### ***Monodopsis* / *Pseudotetraedriella***

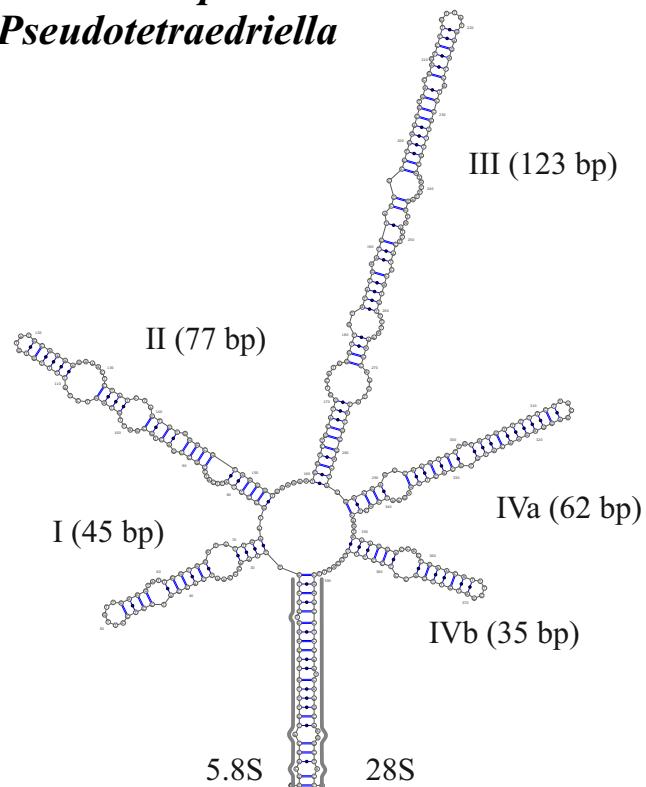

**B.** *Pseudotetraedriella kamillae* SAG 2056

### ***Vischeria*-related**

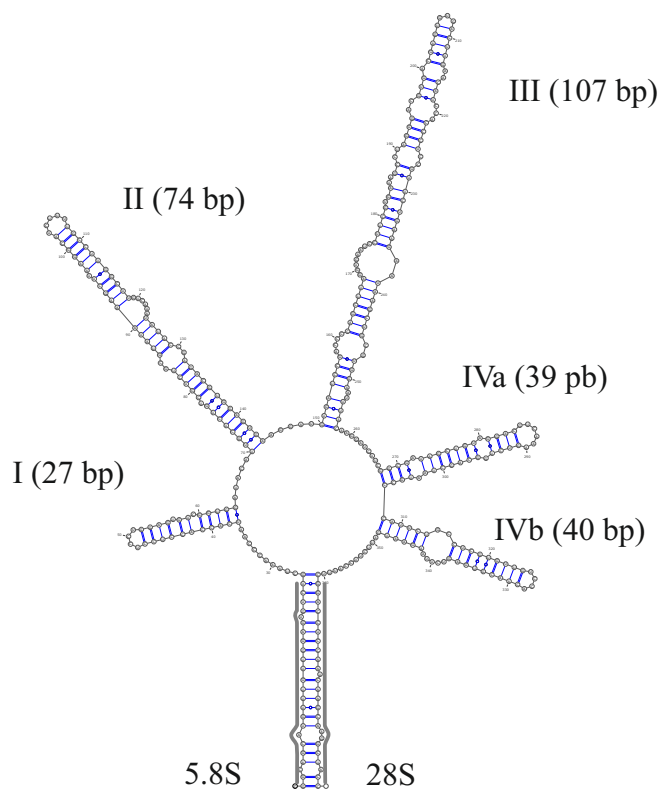

**C.** Unidentified eustigmatophyte SAG 2217

### ***Nannochloropsis* / *Microchloropsis***

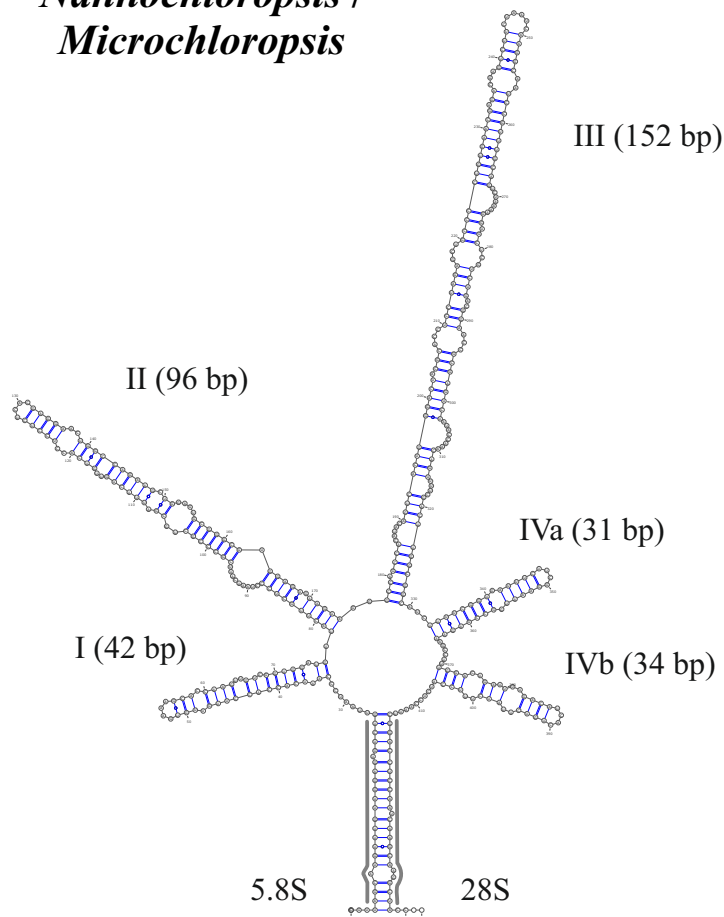

**D.** *Nannochloropsis limnetica* SAG 18.99
