# Supplementary material
Source: publisher figshare collection journal article supplement (https://tandf.figshare.com/articles/dataset/_/7054295)

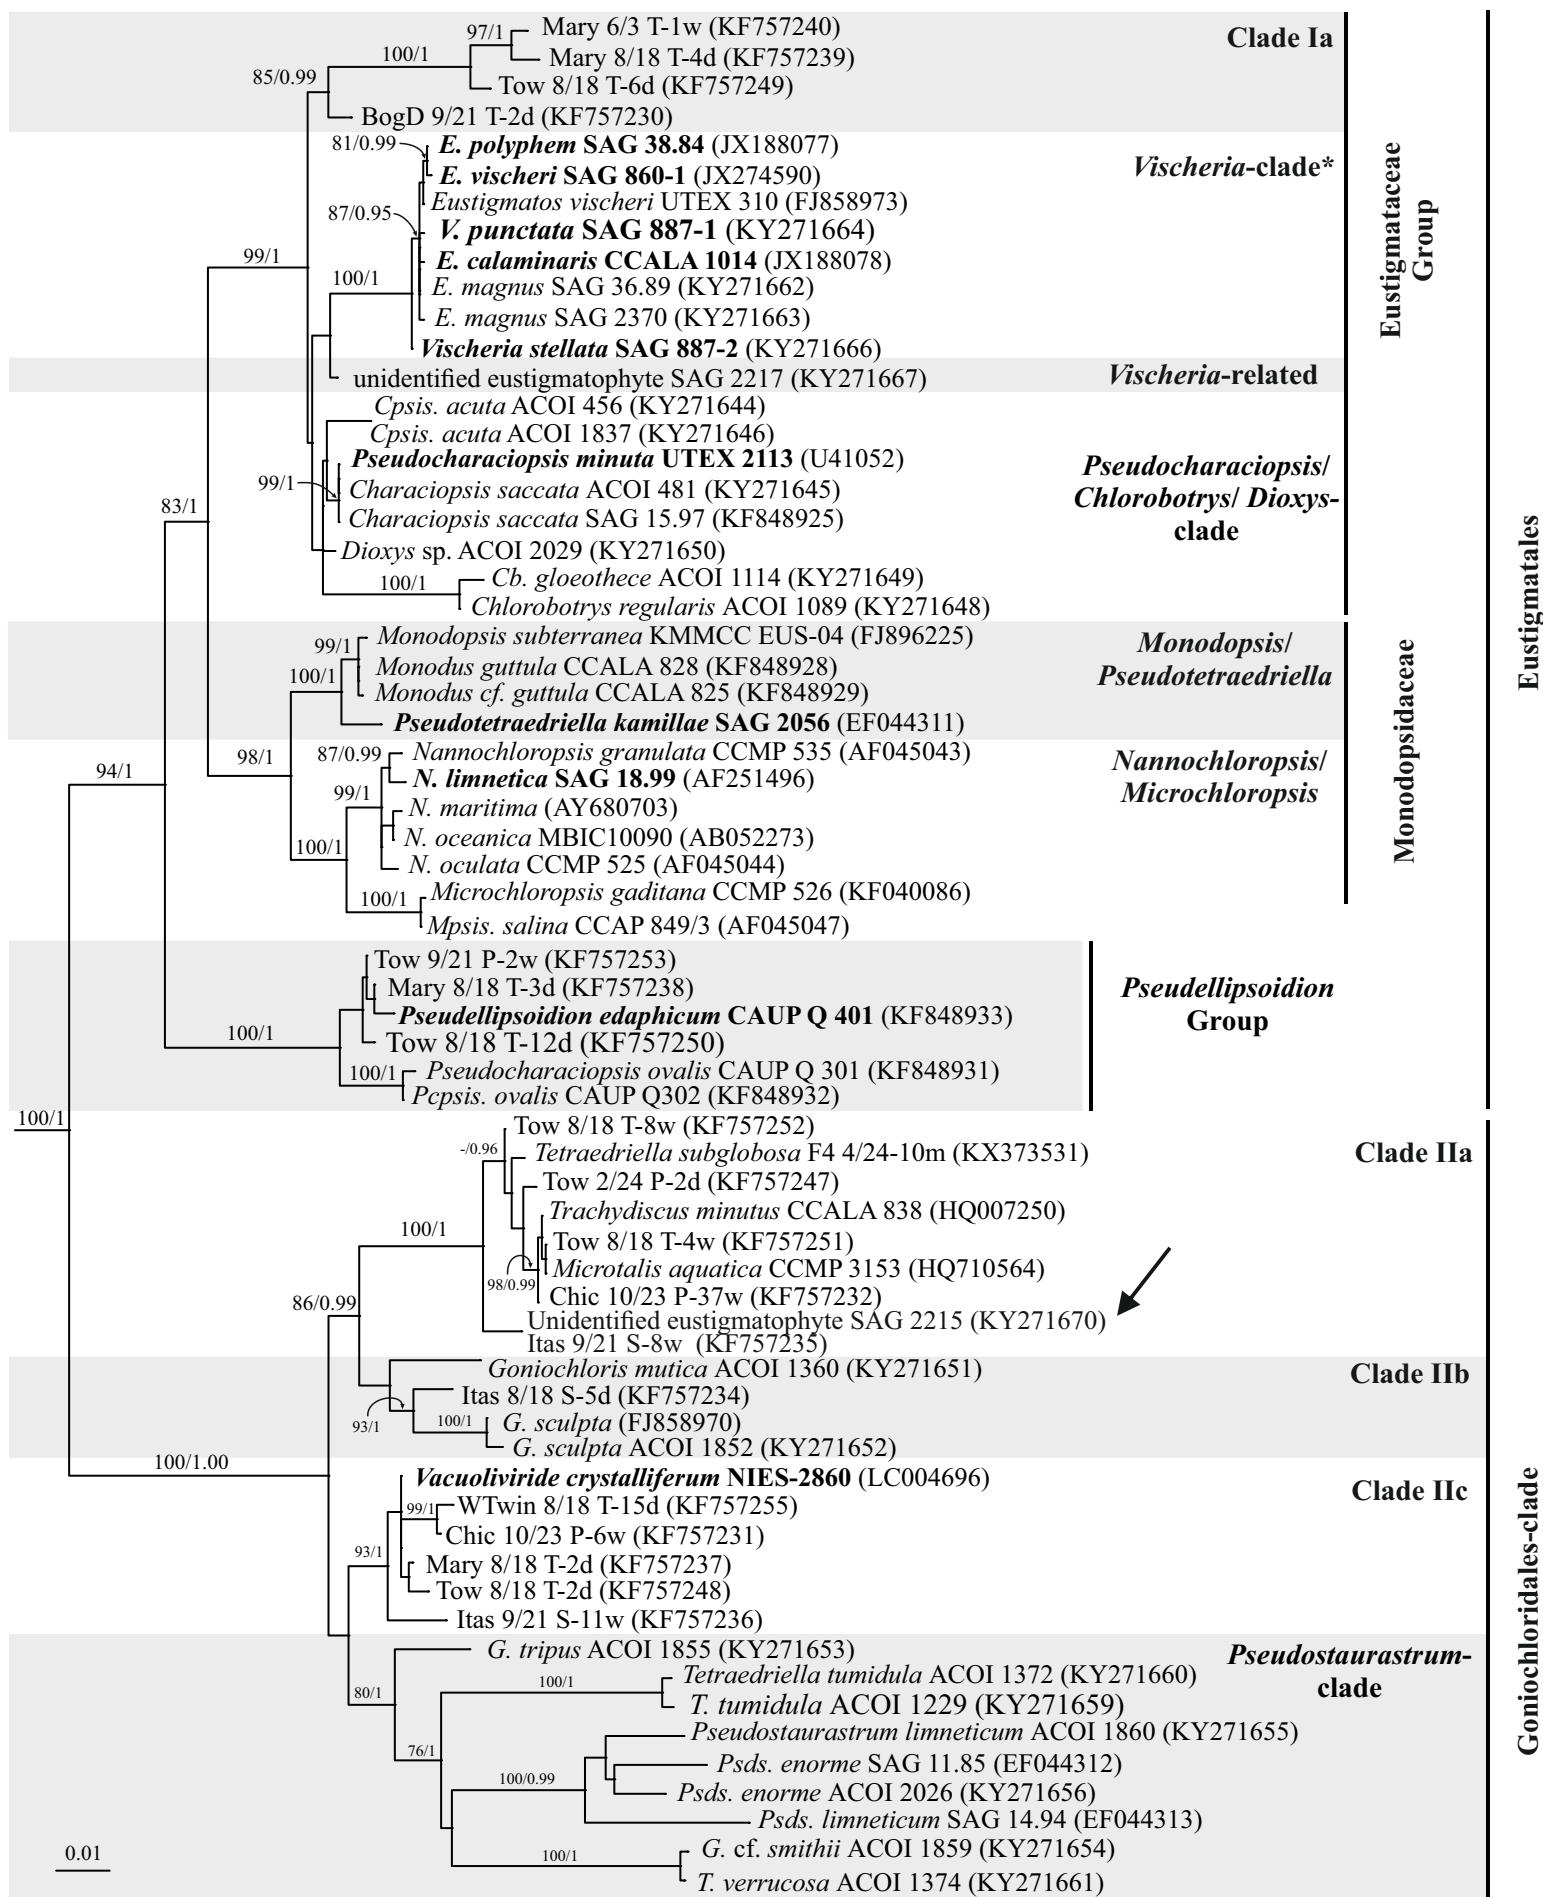

Supplement: Supplementary file 3 [file 1]

A

|            |        | variable /parsimony informative sites |      |     |       |
|------------|--------|---------------------------------------|------|-----|-------|
|            | length | total                                 | 1st  | 2nd | 3rd   |
| nucleotide | 1227   | 37/20                                 | 11/8 | 2/1 | 24/11 |
| protein    | 409    | 10/9                                  |      |     |       |

B

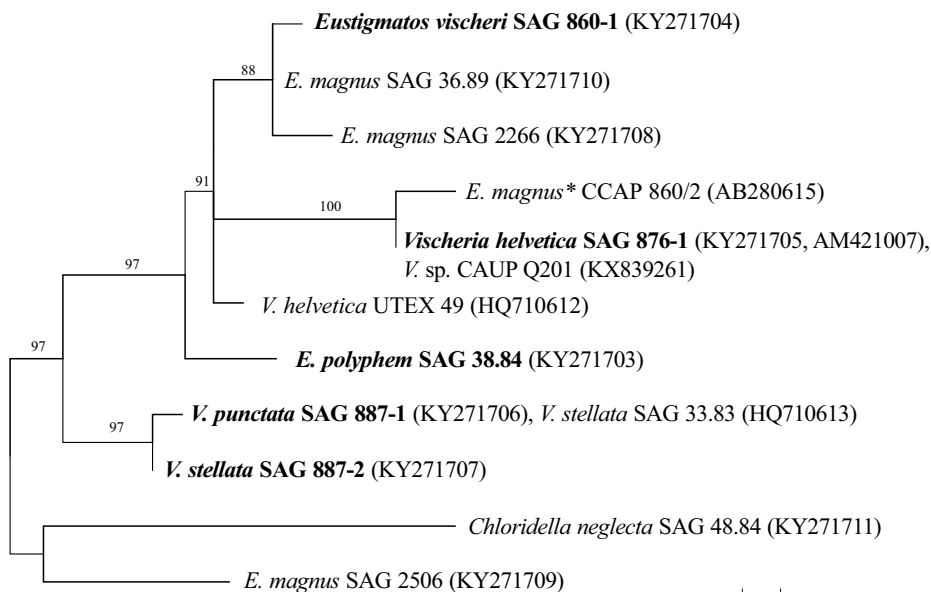

Supplement: Supplementary file 4 [file 1]

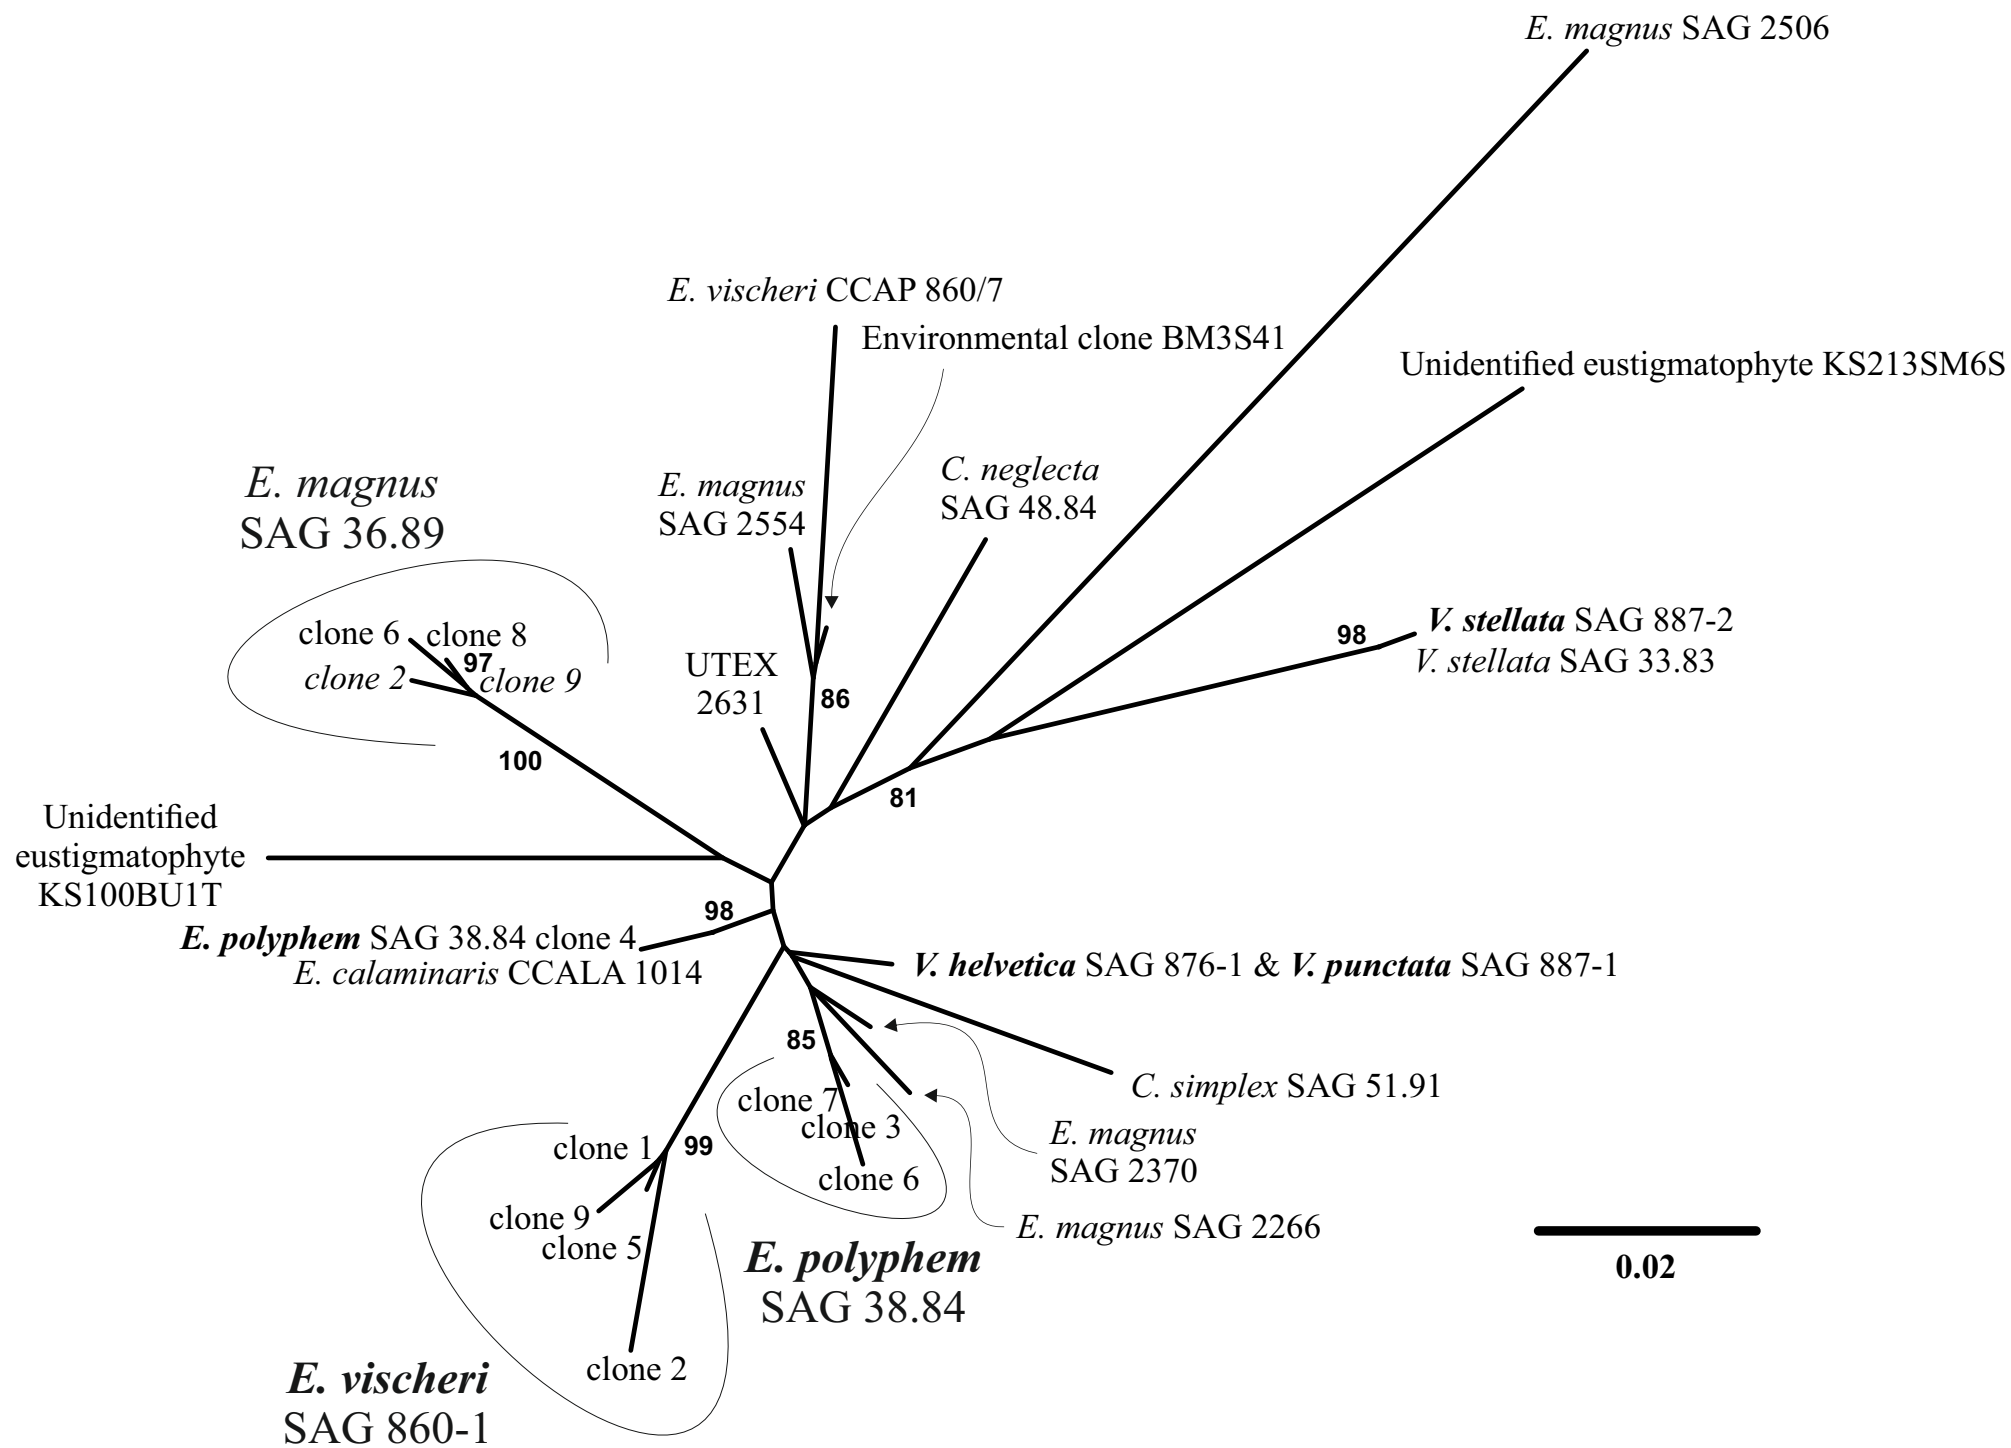

Supplement: Supplementary file 6 [file 1]
